# Supplementary material for: Neuronal Adenosine A1 Receptor is Critical for Olfactory Function but Unable to Attenuate Olfactory Dysfunction in Neuroinflammation
Source: Frontiers journal article supplement (doi:10.3389/fncel.2022.912030), 2022-06-30
Supplement: Data_Sheet_1.pdf [file Data_Sheet_1.pdf]

## Supplementary Figure 1

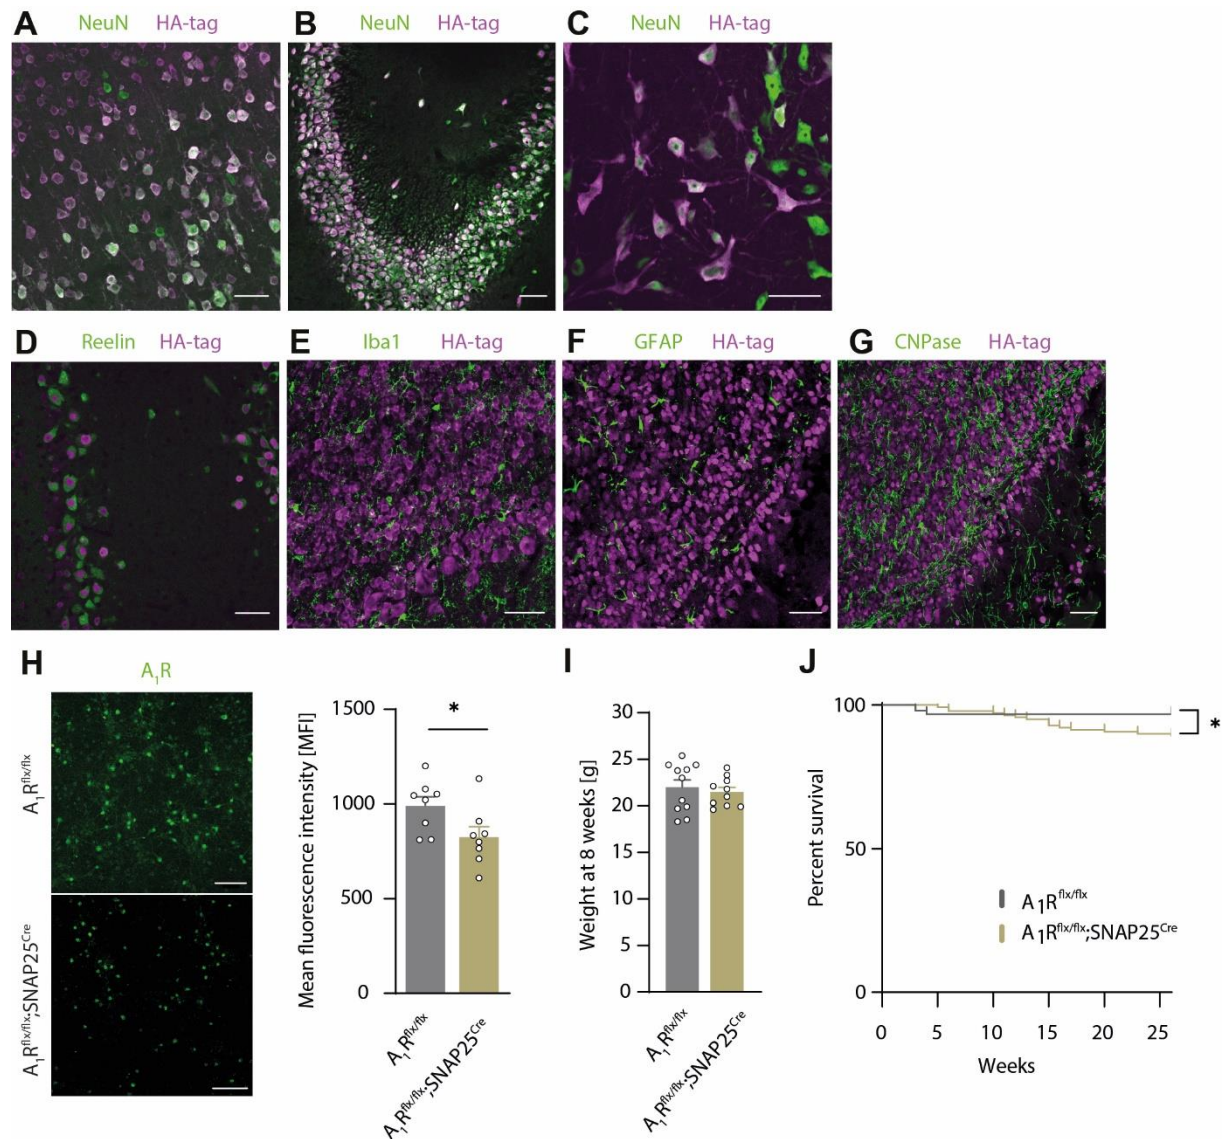

**Supplementary Figure 1 | Characterization of  $A_1R^{flx/flx};SNAP25^{Cre}$  mice.** (A–C) Reporter expression in neuron-specific mouse line  $A_1R^{flx/flx};Tag;SNAP25^{Cre}$  indicates a wide distribution of Cre expression in different brain regions (scale bars = 50  $\mu$ m): (A) cortex, (B) hippocampus: CA3 region of the dentate gyrus and (C) spinal cord: motor neurons in the ventricular horn are shown. HA-tag counterstained with anti-HA antibody (magenta) labeling Cre expression cells, NeuN counterstaining (green) stains the majority of neurons in these areas. (D) Mitral cells and tufted cells were stained by marker Reelin (green) with Tag (magenta) in the main olfactory bulb in the  $A_1R^{flx/flx};Tag;SNAP25^{Cre}$ . (E–G) Immunostaining of the HA-tag (magenta) in the  $A_1R^{flx/flx};Tag;SNAP25^{Cre}$  together with specific markers for (E) microglia (Iba1), (F) astrocytes (GFAP) and (G) oligodendrocytes (CNPase) in green (Scale bars = 50  $\mu$ m). (H) Mean fluorescence intensity of the antibody directed against  $A_1R$  in  $A_1R^{flx/flx}$  and  $A_1R^{flx/flx};SNAP25^{Cre}$  primary neuronal culture as representative images (left, scale bar = 100  $\mu$ m) and quantification (right) (four biological replicates with two technical replicates each). (I) Mean weight of  $A_1R^{flx/flx}$  and  $A_1R^{flx/flx};SNAP25^{Cre}$  mice at 8 weeks of age (BF<sub>10</sub> = 0.327). (J) Kaplan-Meier survival curve of  $A_1R^{flx/flx}$  ( $n$  = 139) and  $A_1R^{flx/flx};SNAP25^{Cre}$  ( $n$  = 170) animals until the age of 26 weeks. Log rank test were performed. \* $P$  < 0.05.
