# Supplementary material for: Neuronal Adenosine A1 Receptor is Critical for Olfactory Function but Unable to Attenuate Olfactory Dysfunction in Neuroinflammation
Source: Frontiers journal article supplement (doi:10.3389/fncel.2022.912030), 2022-06-30
Supplement: Data_Sheet_3.pdf [file Data_Sheet_3.pdf]

### Supplementary Figure 3

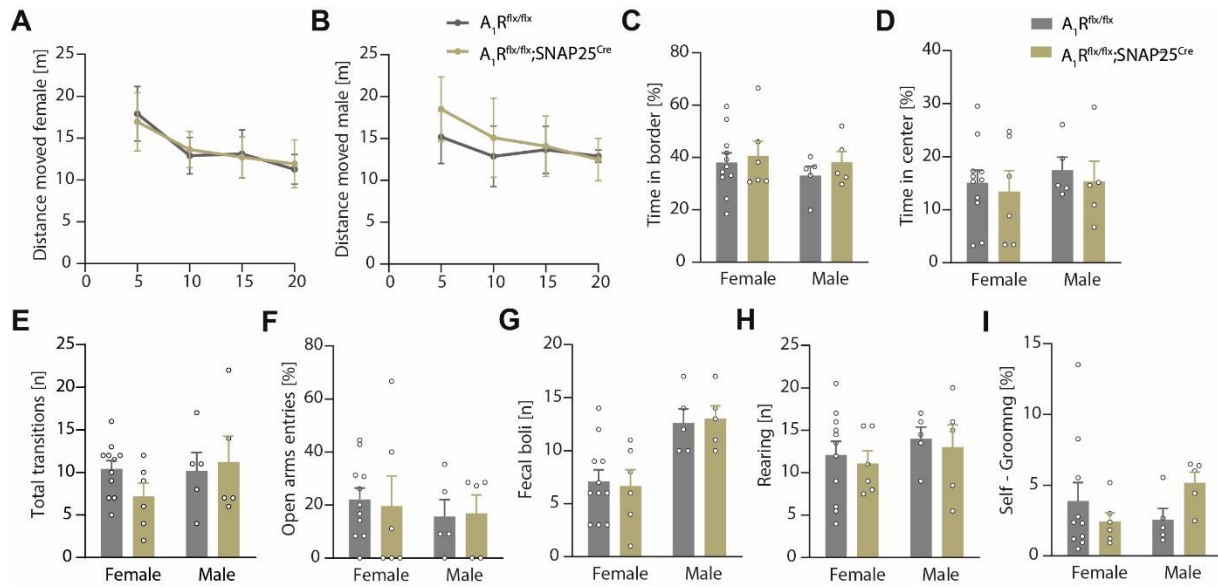

**Supplementary Figure 3 | Neuronal  $A_1R$  does not affect exploratory and anxiety behaviors.** Exploratory and anxiety behavior was analyzed in  $A_1R$ -proficient and  $A_1R$ -deficient mice. To reveal sex differences, animals were analyzed separately in  $A_1R^{flx/flx}$  ( $n(f) = 11$ ,  $n(m) = 5$ ) and  $A_1R^{flx/flx};SNAP25^{Cre}$  ( $n(f) = 6$ ,  $n(m) = 5$ ). **(A–D)** Open field test. The distance animals moved in the open field measured in meter in female **(A)** and male **(B)** mice of  $A_1R^{flx/flx}$  and  $A_1R^{flx/flx};SNAP25^{Cre}$ . Repeated measures were analyzed by two way ANOVA. **(C)** Percentage of time mice spent at the border in the open field test ( $BF_{10}(f) = 0.445$ ,  $BF_{10}(m) = 0.647$ ). **(D)** Percentage of time mice spent in the center of the open field ( $BF_{10}(f) = 0.452$ ,  $BF_{10}(m) = 0.527$ ). **(E–I)** Elevated maze test. **(E)** Number of transitions between experimental arms in the elevated plus maze ( $BF_{10}(f) = 1.299$ ,  $BF_{10}(m) = 0.504$ ). **(F)** Percentage of entries in the arms without walls in the elevated plus maze ( $BF_{10}(f) = 0.455$ ,  $BF_{10}(m) = 0.495$ ). **(G)** Number of fecal boli counted in the open field test indicating anxiety behavior ( $BF_{10}(f) = 0.440$ ,  $BF_{10}(m) = 0.500$ ). **(H)** Number of rearing events in male and female mice analyzed in the elevated plus maze ( $BF_{10}(f) = 0.445$ ,  $BF_{10}(m) = 0.510$ ). **(I)** Percentage of time per trial demonstrating behavior of self-grooming during the elevated plus maze testing ( $BF_{10}(f) = 0.545$ ,  $BF_{10}(m) = 1.143$ ).
