# Supplementary material for: Neuronal Adenosine A1 Receptor is Critical for Olfactory Function but Unable to Attenuate Olfactory Dysfunction in Neuroinflammation
Source: Frontiers journal article supplement (doi:10.3389/fncel.2022.912030), 2022-06-30
Supplement: Data_Sheet_4.pdf [file Data_Sheet_4.pdf]

## Supplementary Figure 4

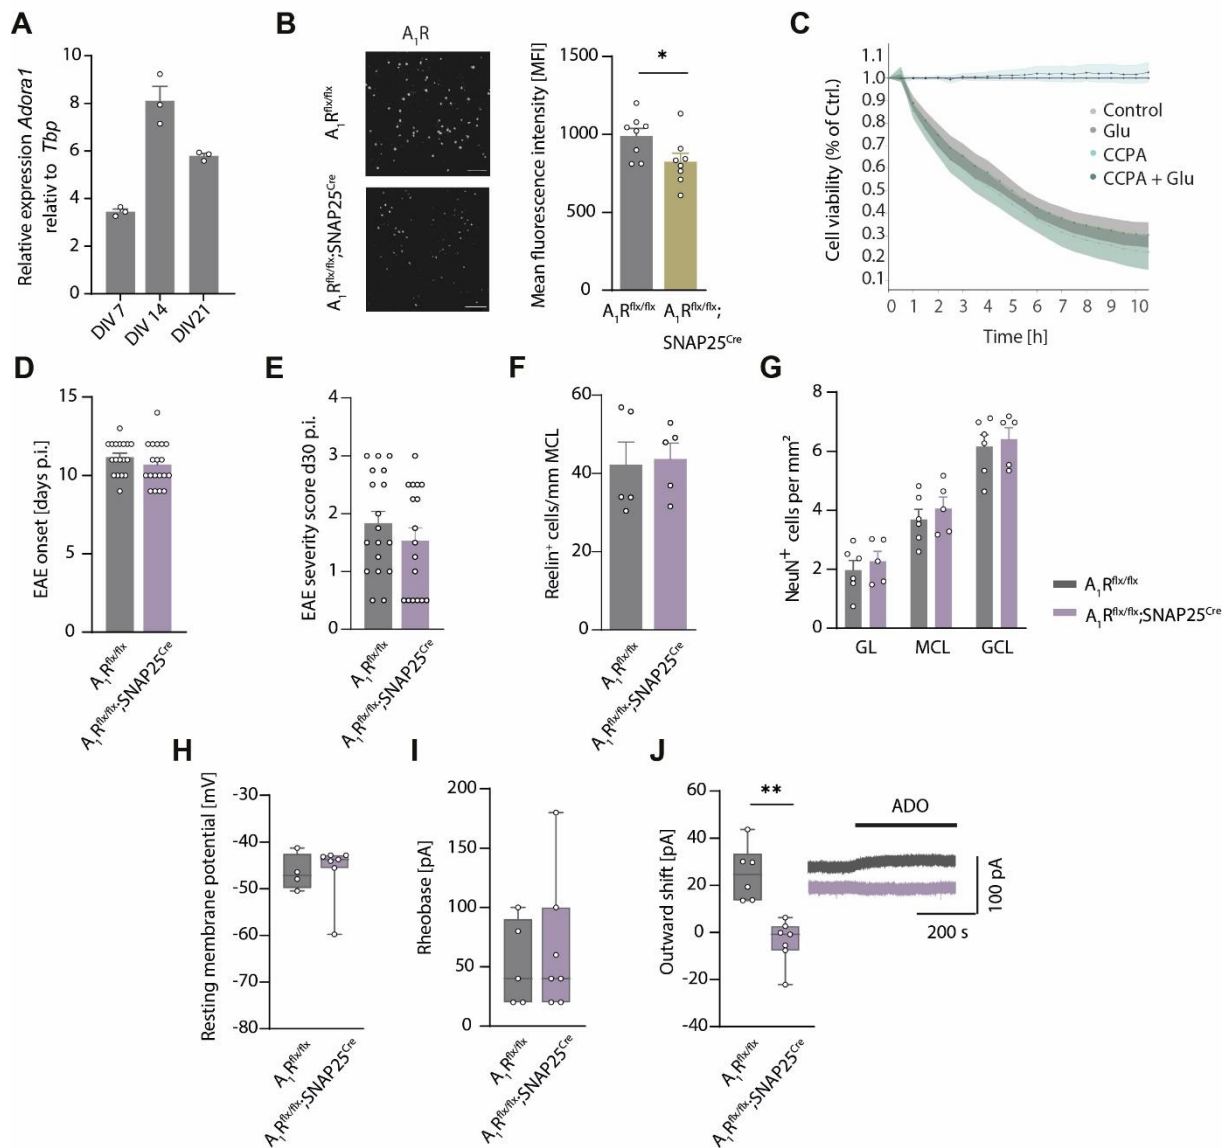

**Supplementary Figure 4 | Neuronal A<sub>1</sub>R is not involved in glutamate excitotoxicity *in vitro* and neuronal injury in experimental autoimmune encephalomyelitis.** (A) Primary neuronal cultures of the mouse olfactory bulb. Relative RNA expression of *Adora1* measured by qRT-PCR at day of days *in vitro* (DIV) 7, 14 and 21. (B) Representative image and quantification of mean fluorescence intensity in immunocytochemical staining of A<sub>1</sub>R in A1R<sup>flx/flx</sup> and A1R<sup>flx/flx</sup>;SNAP25<sup>Cre</sup> neuronal cultures ( $n = 4$  biological replicates per group with two technical replicates each). (C) Cell viability of wildtype olfactory bulb primary neuronal cultures DIV16-18 over a time course of ten hours after treatment with glutamic acid (5 μM) preincubated with 100 nM 2-chloro-N6-cyclopentyladenosine (CCPA) or medium control compared to the respective controls ( $n = 4$  biological replicates with at least 5 technical replicates each). (D) Day of onset in experimental autoimmune encephalomyelitis (EAE) (BF<sub>10</sub> = 0.307). (E) EAE severity score at the final day 30 p.i. in A1R<sup>flx/flx</sup> and A1R<sup>flx/flx</sup>;SNAP25<sup>Cre</sup> ( $n = 18$  per group, BF<sub>10</sub> = 0.669). (F) Reelin-positive cells in the mitral cell layer based on immunohistochemical staining at peak of EAE day 15 p.i. in A1R<sup>flx/flx</sup> and A1R<sup>flx/flx</sup> SNAP25<sup>Cre</sup> ( $n = 5$  per group, BF<sub>10</sub> = 0.531). (G) Quantification of NeuN-positive cells in the glomerular layer (GL, BF<sub>10</sub> = 0.651), mitral cell layer (MCL, BF<sub>10</sub> = 0.958) and granular cell layer (GCL, BF<sub>10</sub> = 0.666) of the olfactory bulb 30 days p.i. (A1R<sup>flx/flx</sup>,  $n = 6$ ; A1R<sup>flx/flx</sup>;SNAP25<sup>Cre</sup>,  $n = 5$ ).

**(H)** Resting membrane potential in mitral cells of  $A_1R^{flx/flx}$  ( $n = 4$ ) and  $A_1R^{flx/flx};SNAP25^{Cre}$  ( $n = 7$ ) ( $BF_{10} = 0,494$ ). **(I)** Rheobase (first suprathreshold step of current injection) in mitral cells of  $A_1R^{flx/flx}$  ( $n = 5$ ) and  $A_1R^{flx/flx};SNAP25^{Cre}$  ( $n = 7$ ) ( $BF_{10} = 0,505$ ). **(J)** Adenosine-induced (100  $\mu M$ ) outward current in mitral cells of  $A_1R^{flx/flx}$  ( $n = 6$ ) and  $A_1R^{flx/flx};SNAP25^{Cre}$  ( $n = 7$ ) ( $P = 0,003$ ). \* $P < 0.05$ , \*\* $P < 0,01$ .
